# Supplementary material
Source: PubMed Central journal article supplement (PMC2784077)

# Without CP movement data above 0.3mm

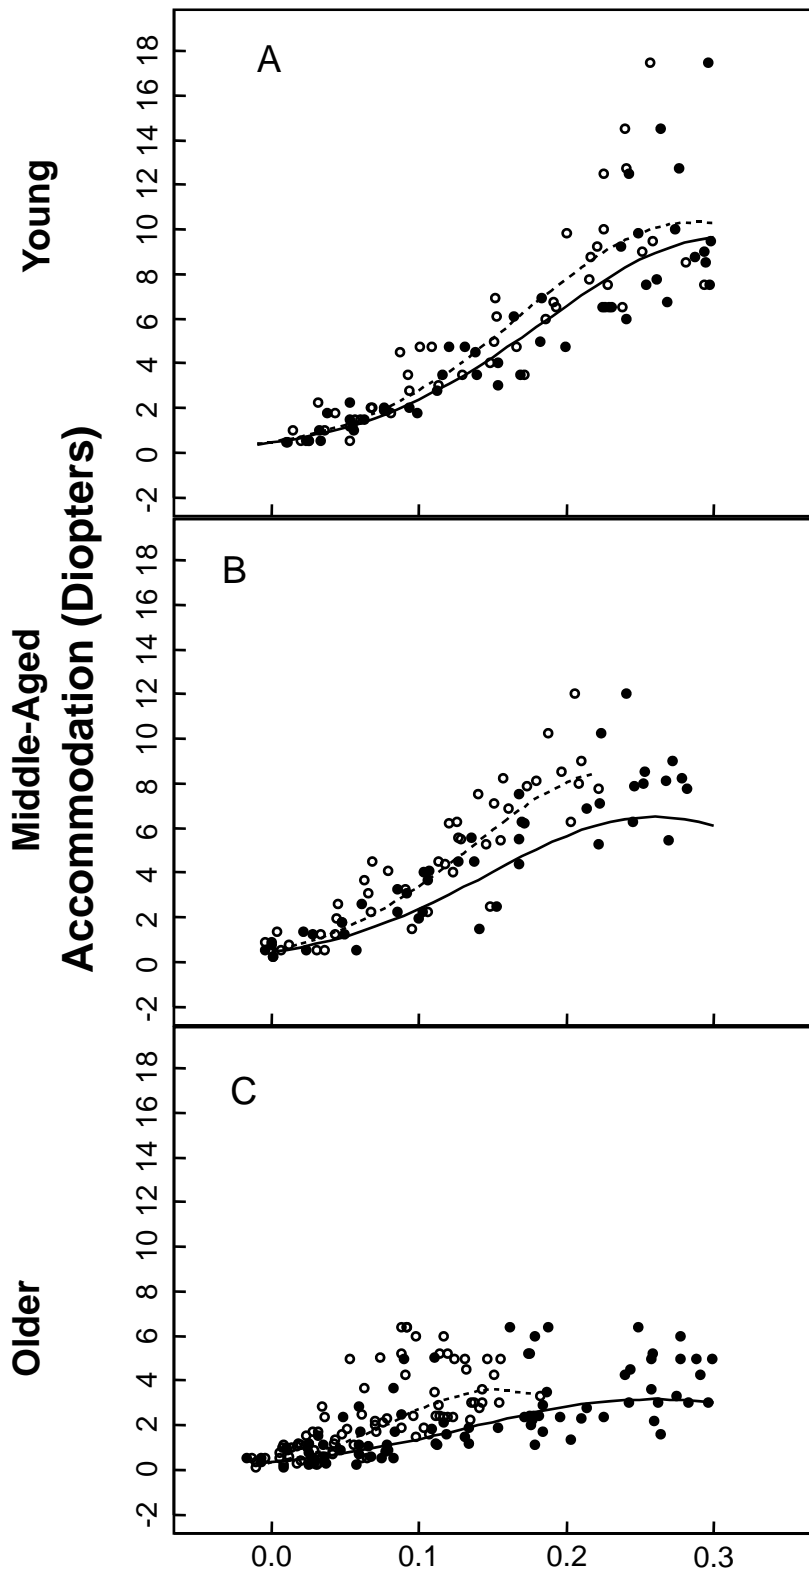

**Supplemental Figure.**

Supplement: NIHMS135159-supplement-01.pdf [file NIHMS135159-supplement-01.pdf]
